# Supplementary material
Source: Springer Nature journal article supplement (https://www.springermedizin.de/resource/supplementary/12913_2007_449_MOESM6_ESM.pdf/9534772)
Supplement: MOESM6 [file 9534772]

**Economic cost in US\$ per mother completing post-test counseling (unit cost)**

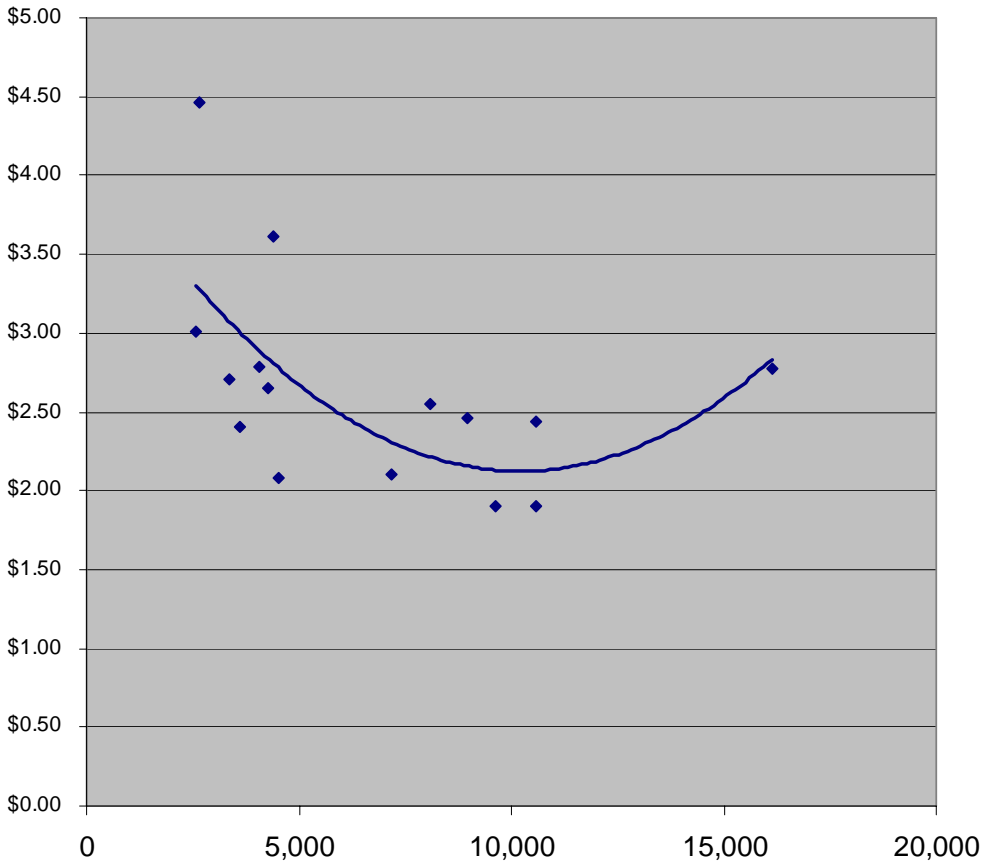

**Mothers completing post-test counseling (scale)**
